# Supplementary material for: A recyclable magnetic nanoparticles supported palladium catalyst for the Hiyama reaction of aryltrialkoxysilanes with aryl halides
Source: Royal Society of Chemistry journal article supplement (doi:10.1039/c2cy20162c), 2012-01-01

Supplementary Material (ESI) for Catalysis Science & Technology

This journal is (c) The Royal Society of Chemistry 2012

# **Recyclable Magnetic Nanoparticles Supported Palladium Catalyst for the Hiyama Reaction of Aryltrialkoxysilanes with Aryl Halides**

Lei Zhang,<sup>[a]</sup> Pinhua Li,<sup>[a]</sup> Hongji Li,<sup>\*[a]</sup> and Lei Wang<sup>\*[a][b]</sup>

<sup>[a]</sup> Department of Chemistry, Huaibei Normal University, Huaibei, Anhui 235000, P R China

Tel: + 86-561-3802-069 Fax: + 86-561-3090-518 E-mail: leiwang@chnu.edu.cn

<sup>[b]</sup> State Key Laboratory of Organometallic Chemistry, Shanghai Institute of Organic Chemistry, Chinese Academy of Sciences, Shanghai 200032, P R China

## *Table of Contents for Supporting Information*

|                                                                      |   |
|----------------------------------------------------------------------|---|
| 1. TEM images of the samples (Figure S1).....                        | 2 |
| 2. XRD of the samples (Figure S2).....                               | 2 |
| 3. <sup>1</sup> H, <sup>13</sup> C NMR spectra of the products ..... | 3 |

## 1. TEM images of the samples

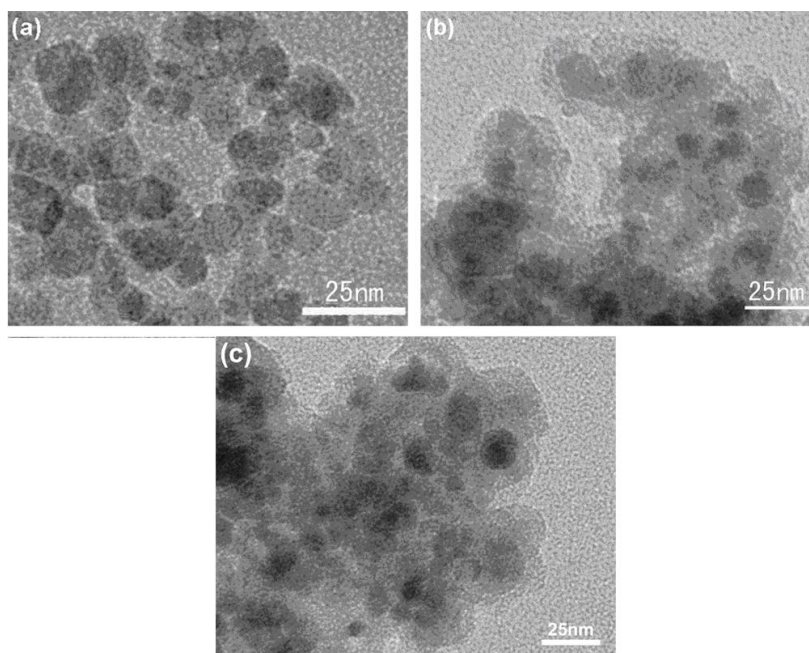

**Figure S1.** TEM images: (a) Fe<sub>3</sub>O<sub>4</sub> nanoparticles; (b) SiO<sub>2</sub>@Fe<sub>3</sub>O<sub>4</sub>; (c) SiO<sub>2</sub>@Fe<sub>3</sub>O<sub>4</sub>-Pd catalyst

## 2. XRD of the samples

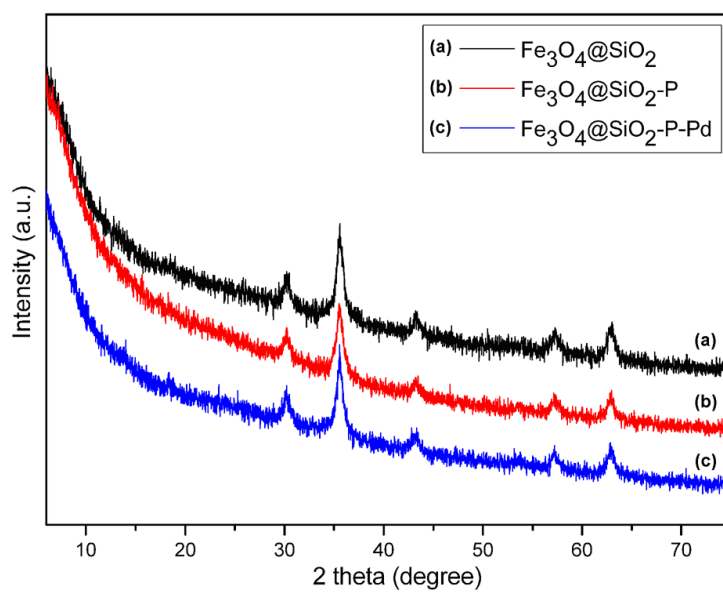

**Figure S2.** XRD of the supported Pd catalyst

### 3. $^1\text{H}$ NMR and $^{13}\text{C}$ NMR spectra of the products

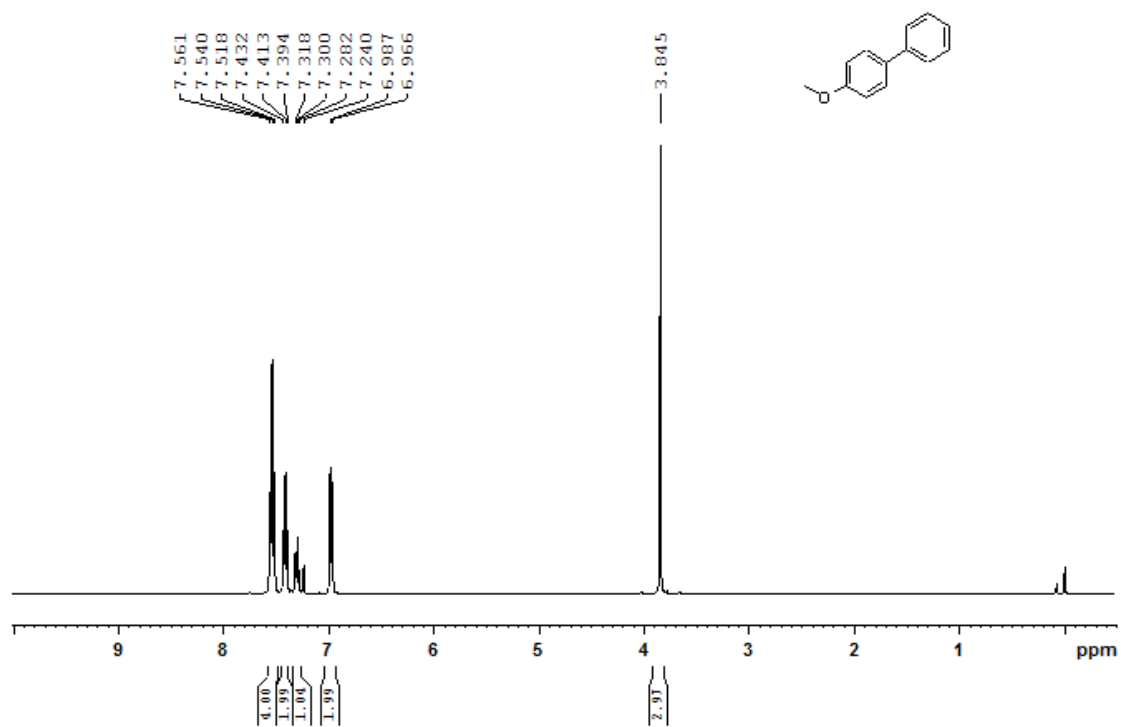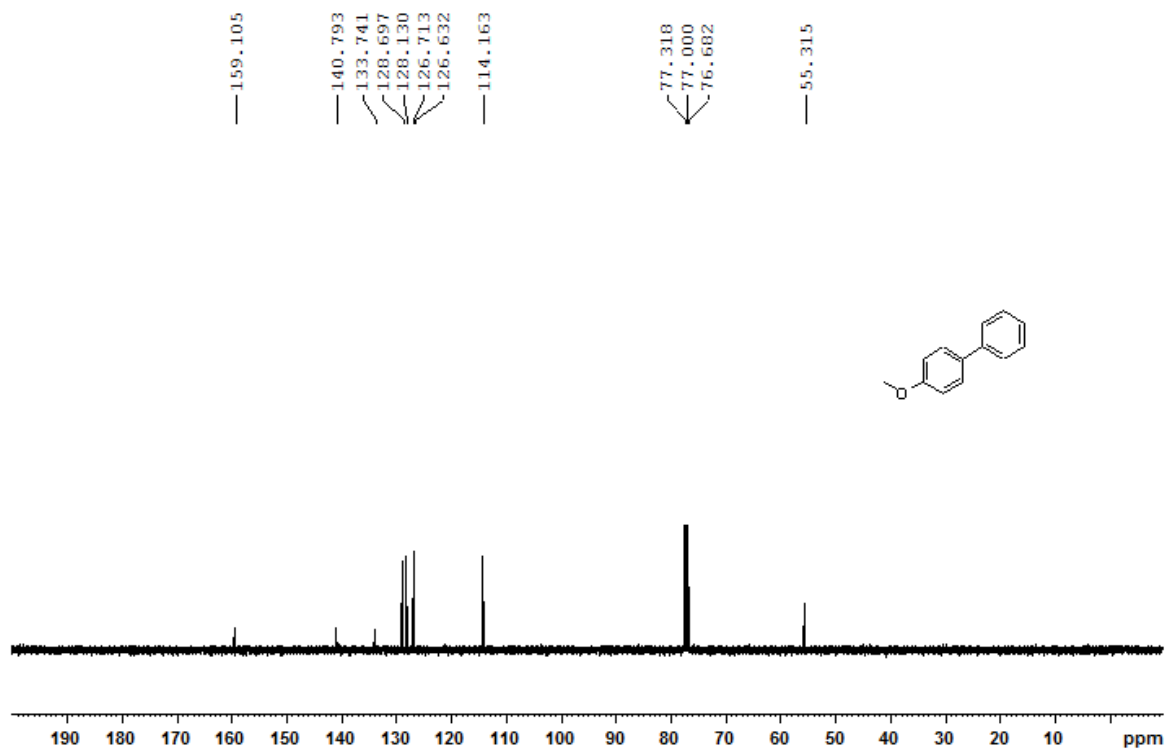

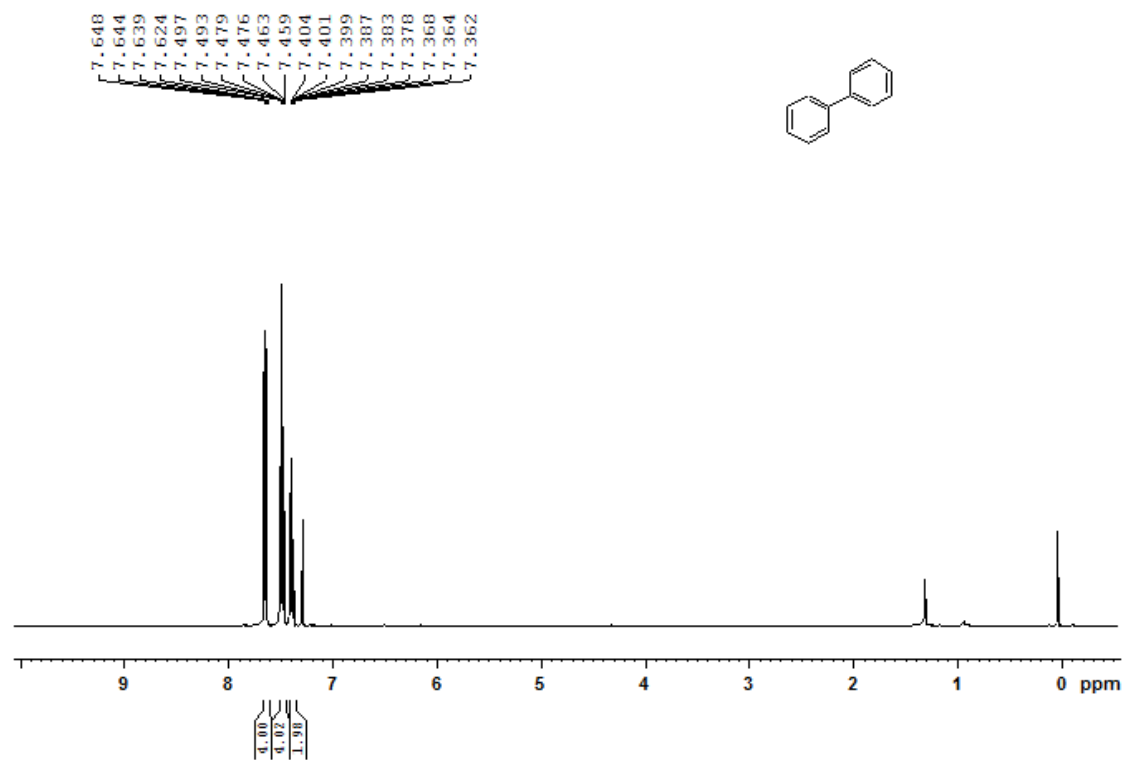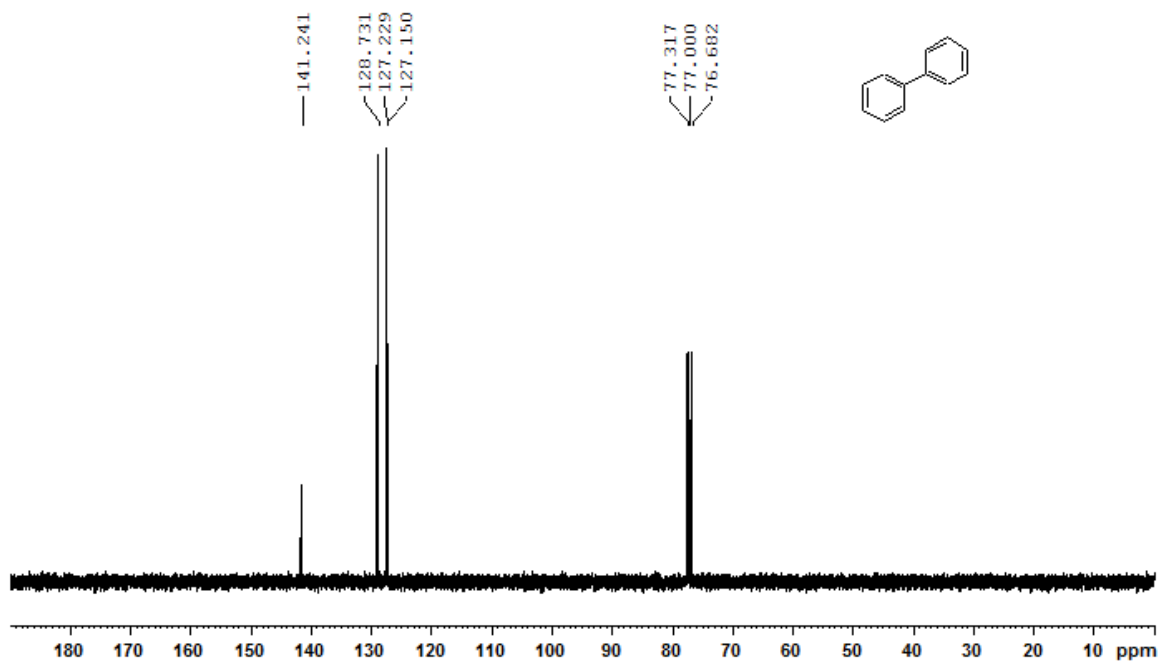

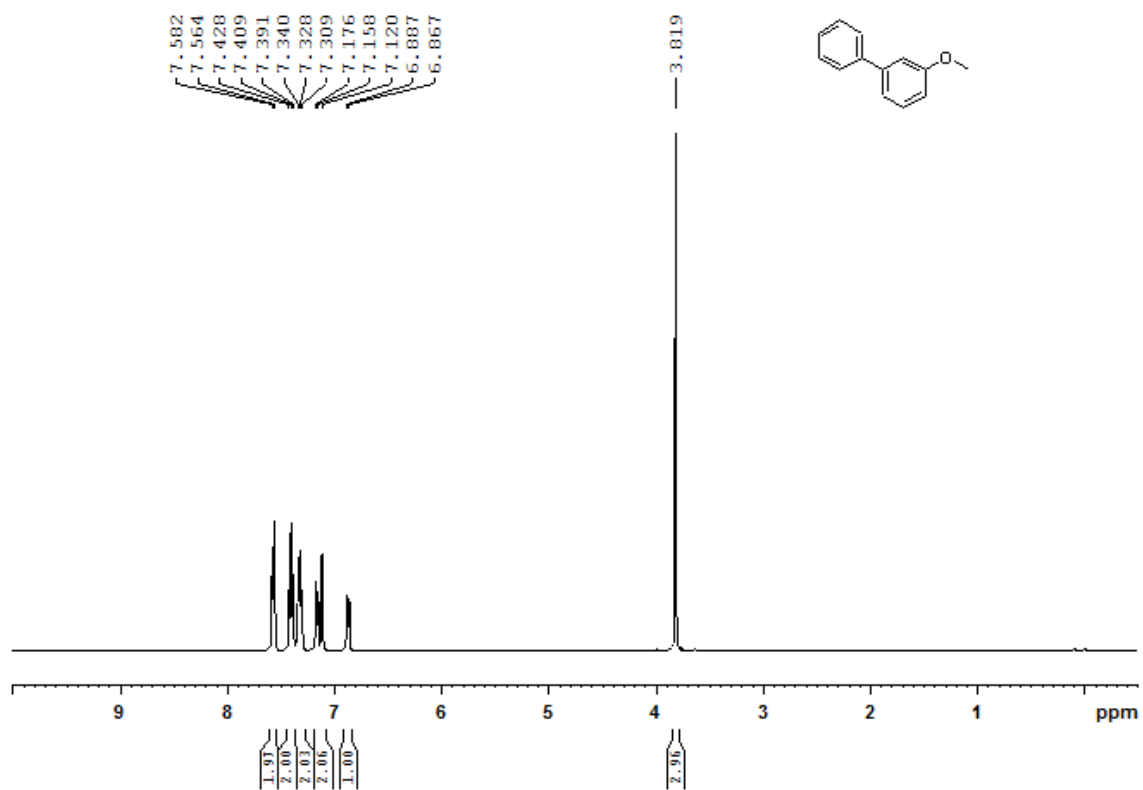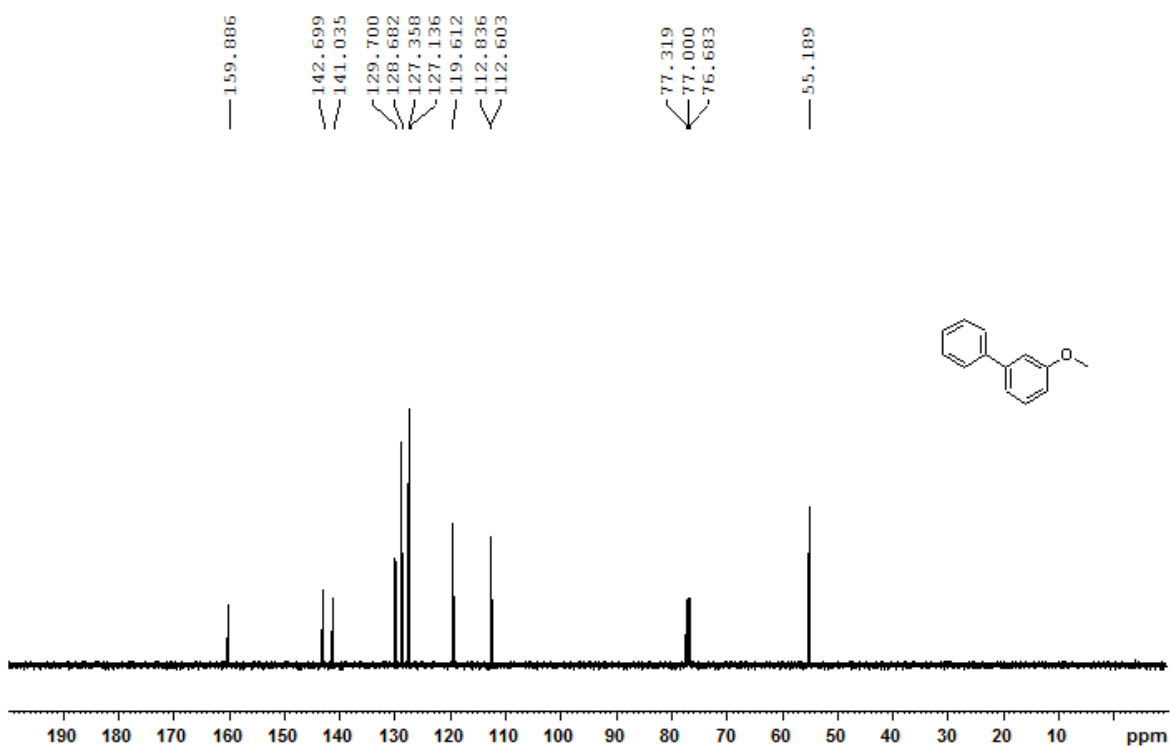

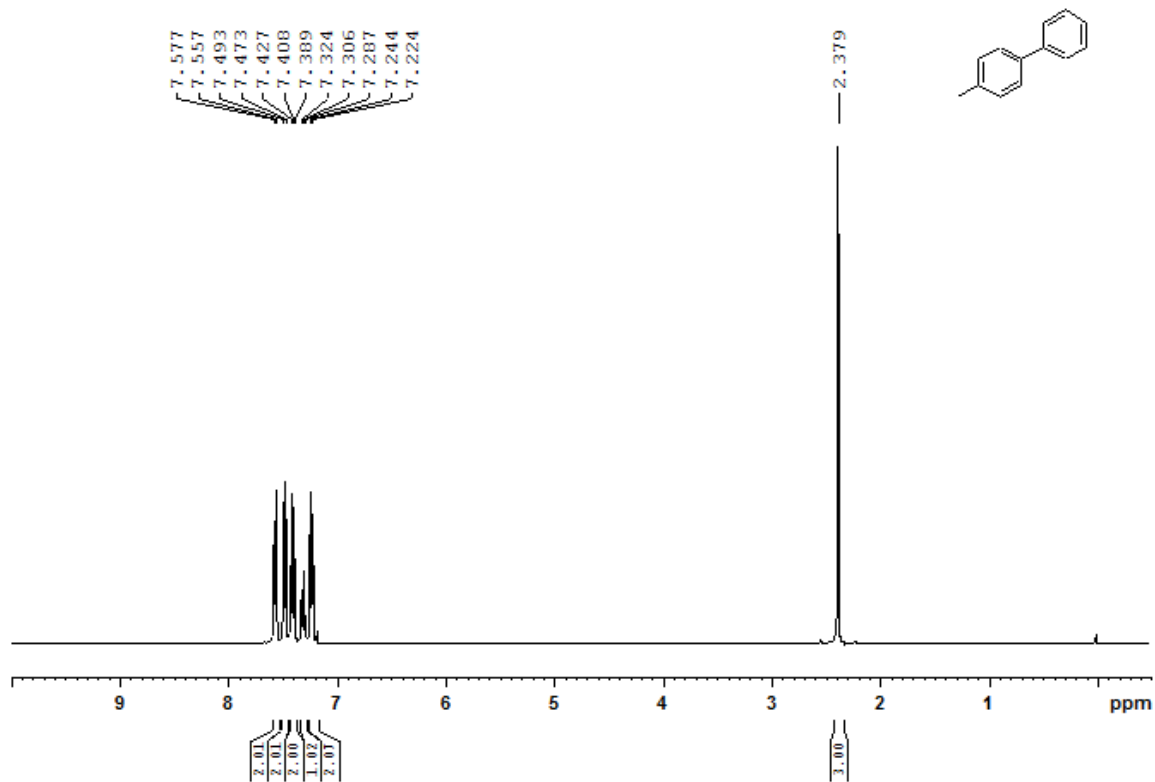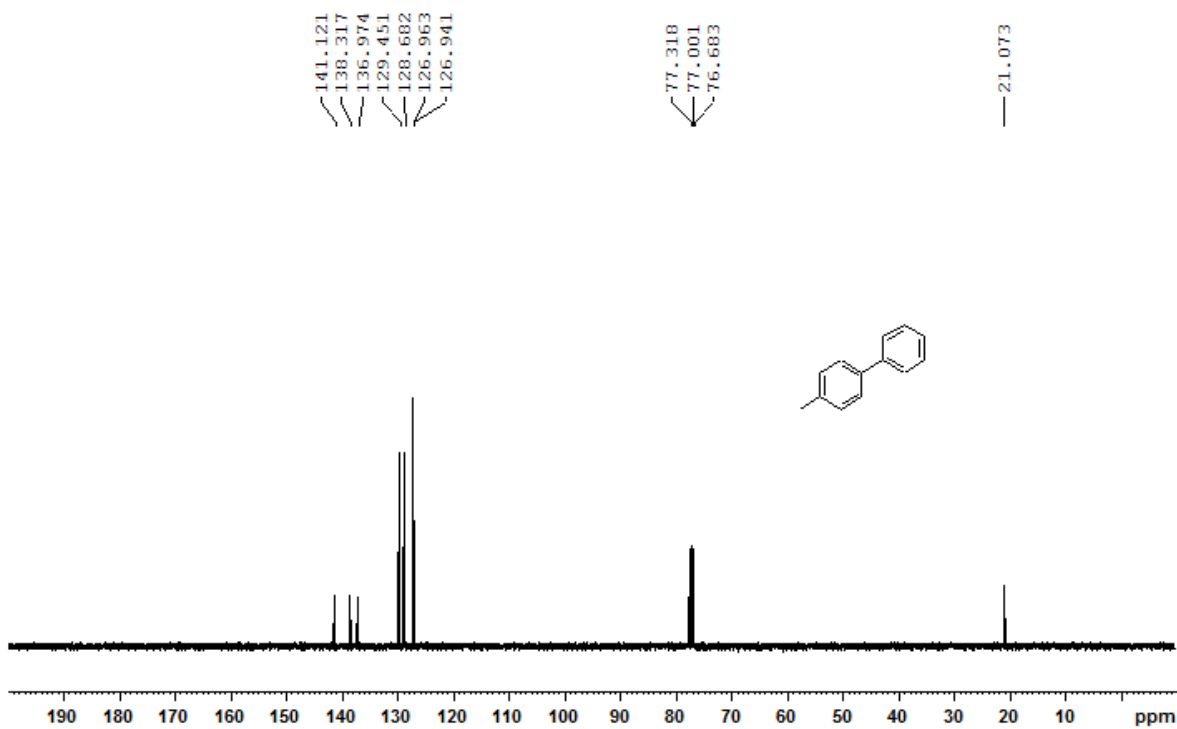

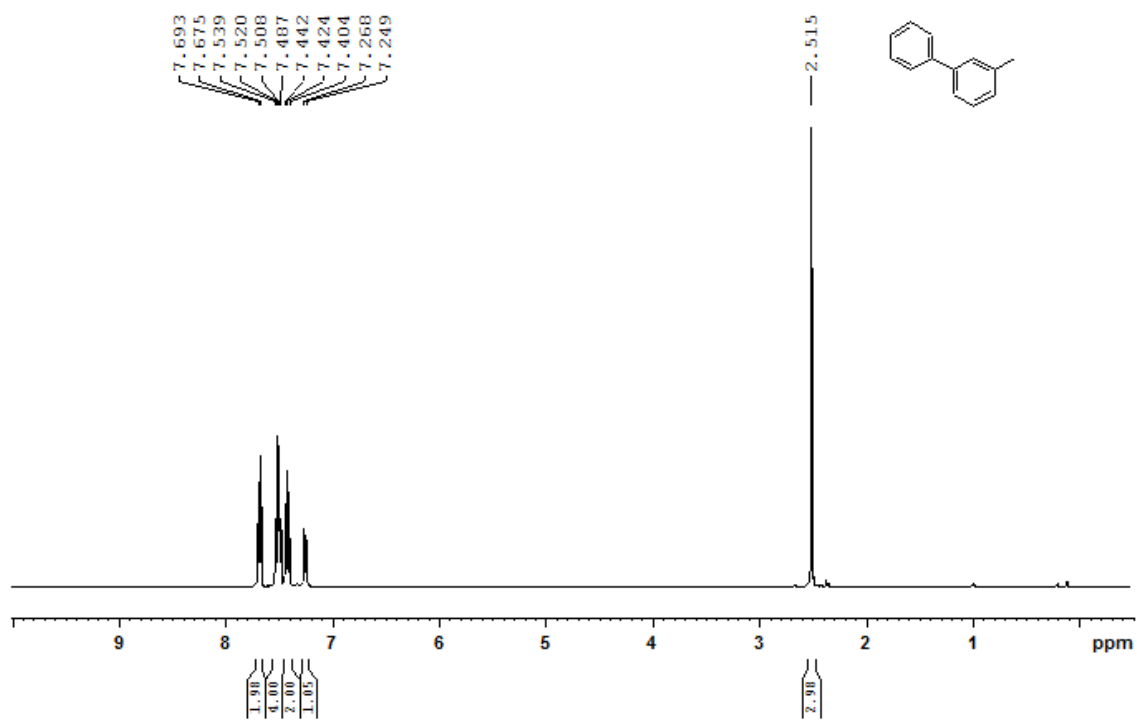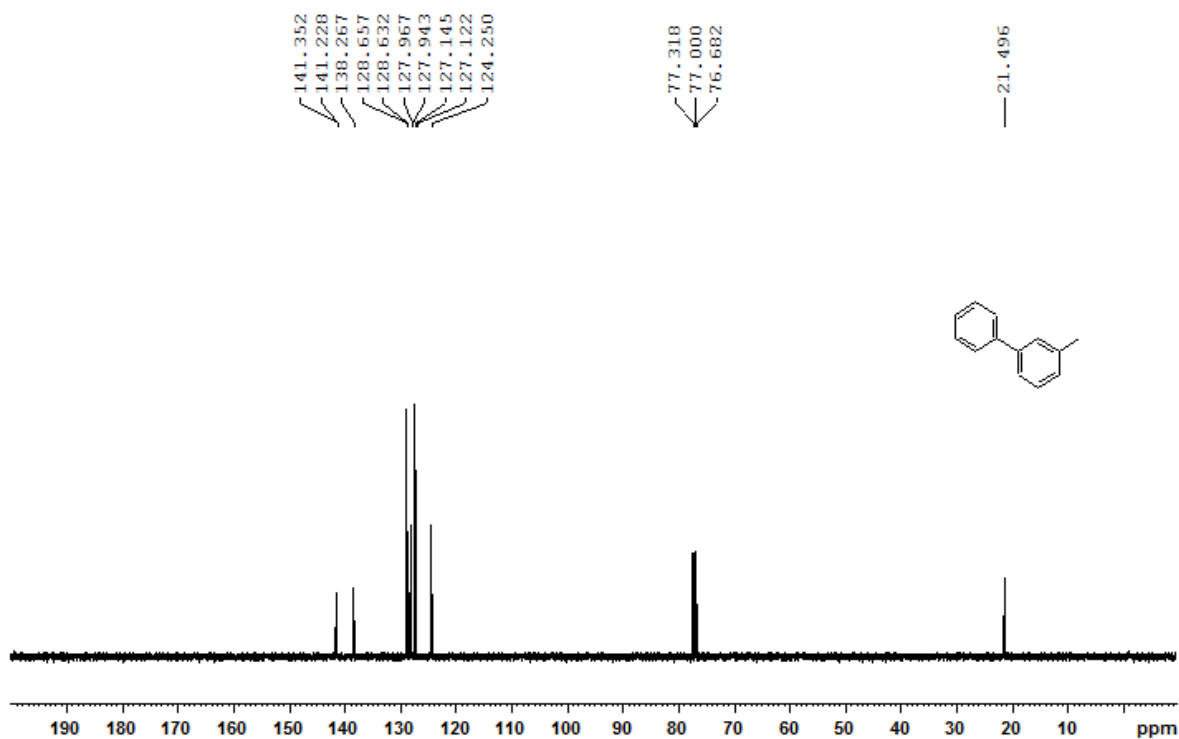

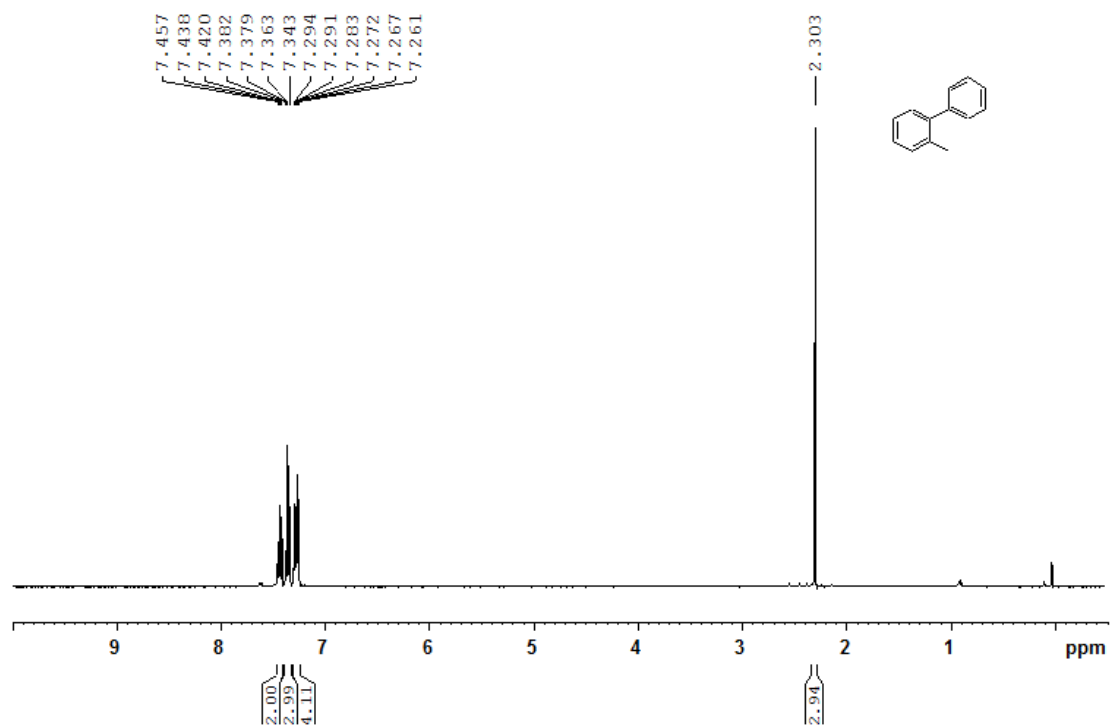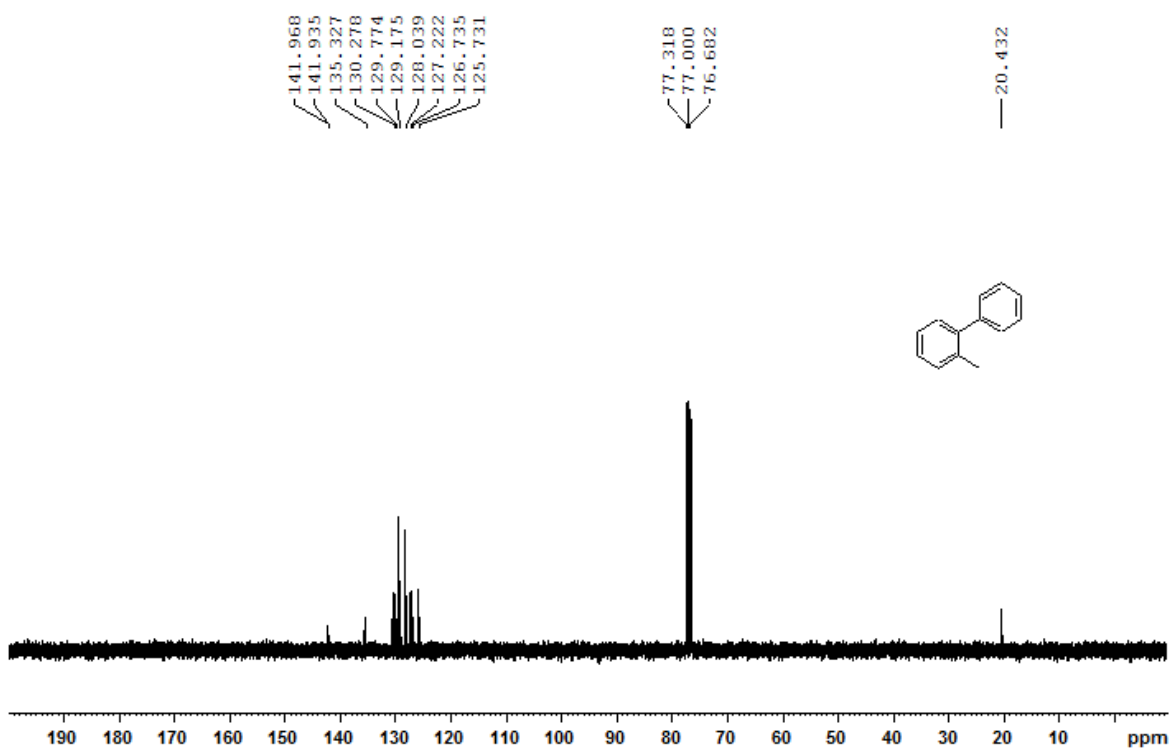



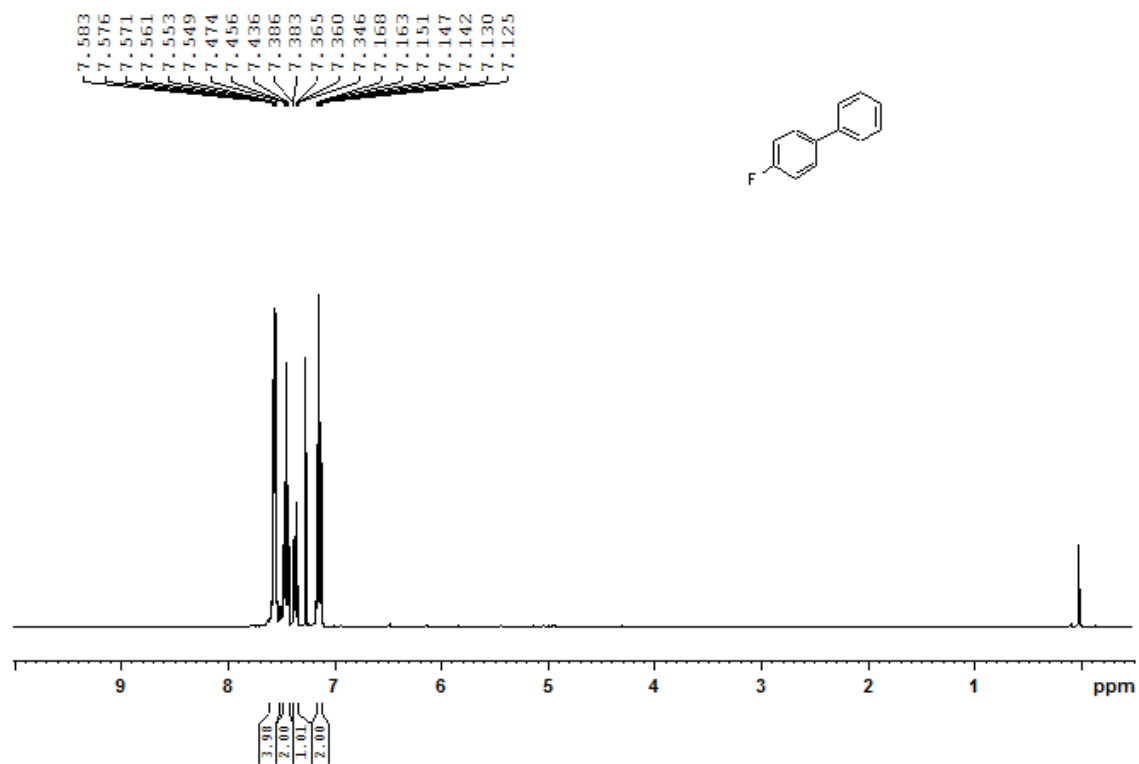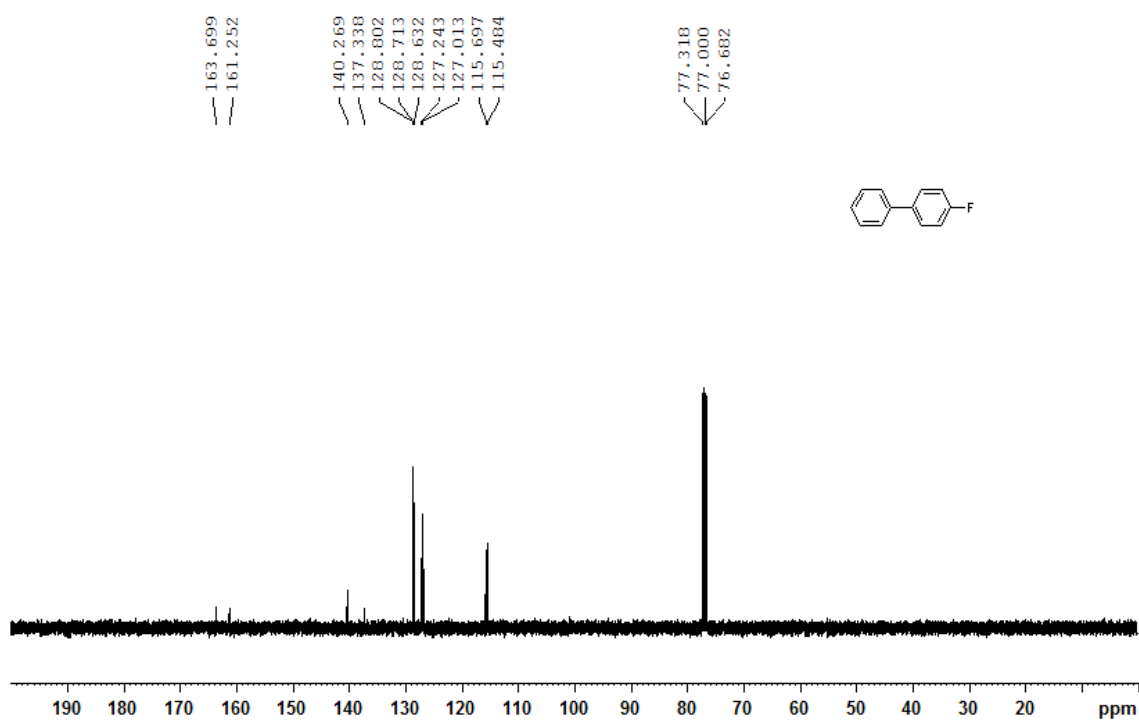

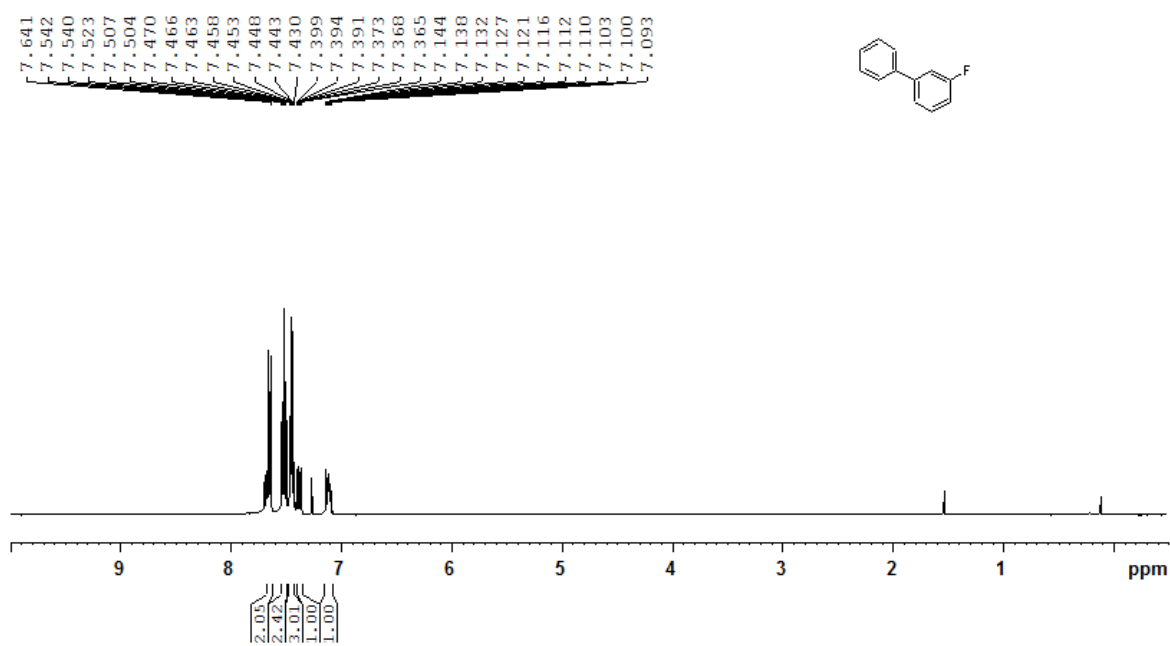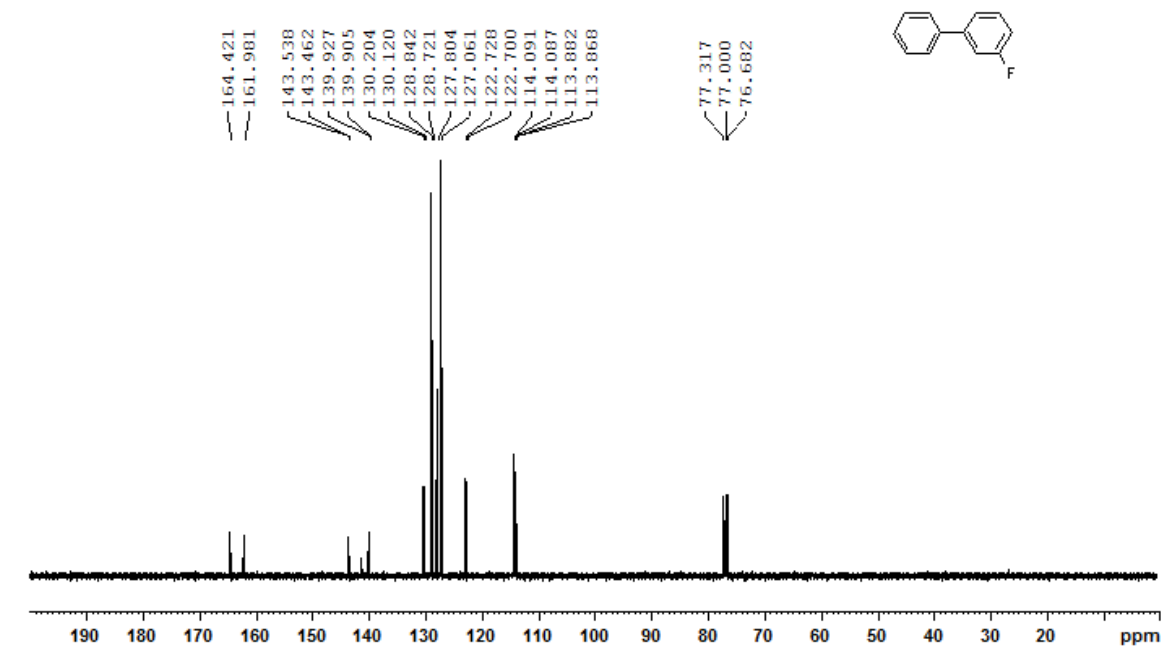

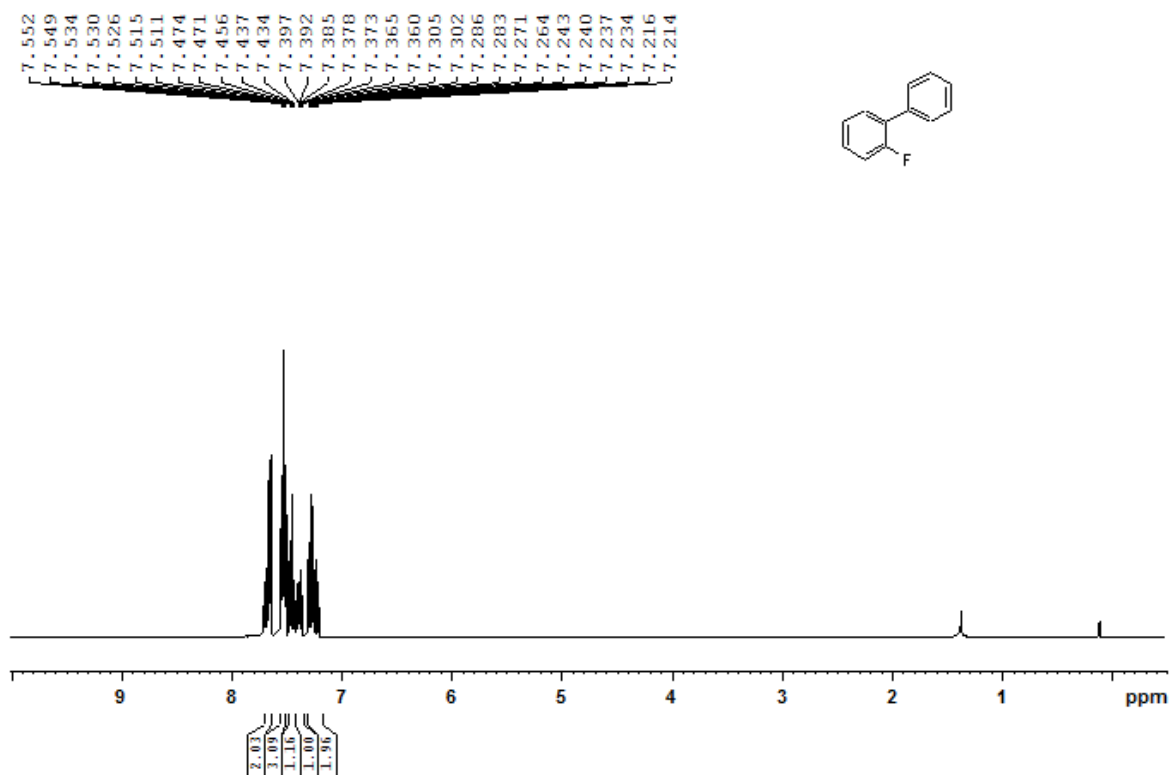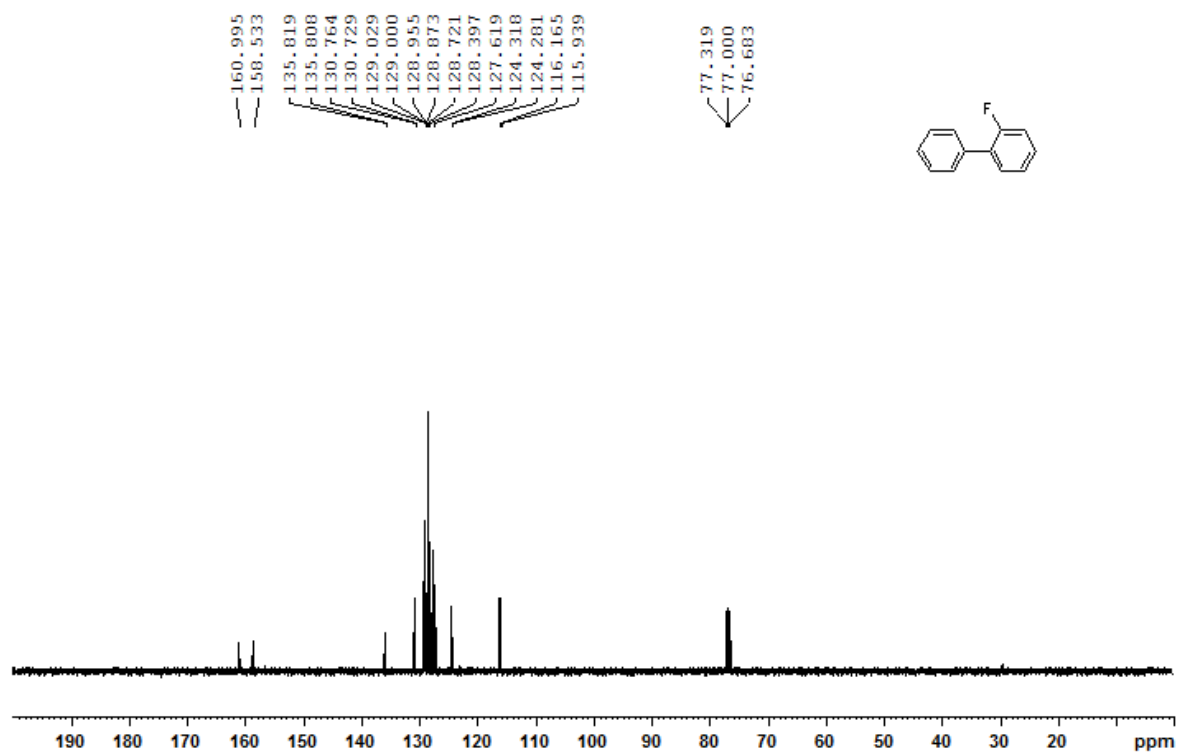

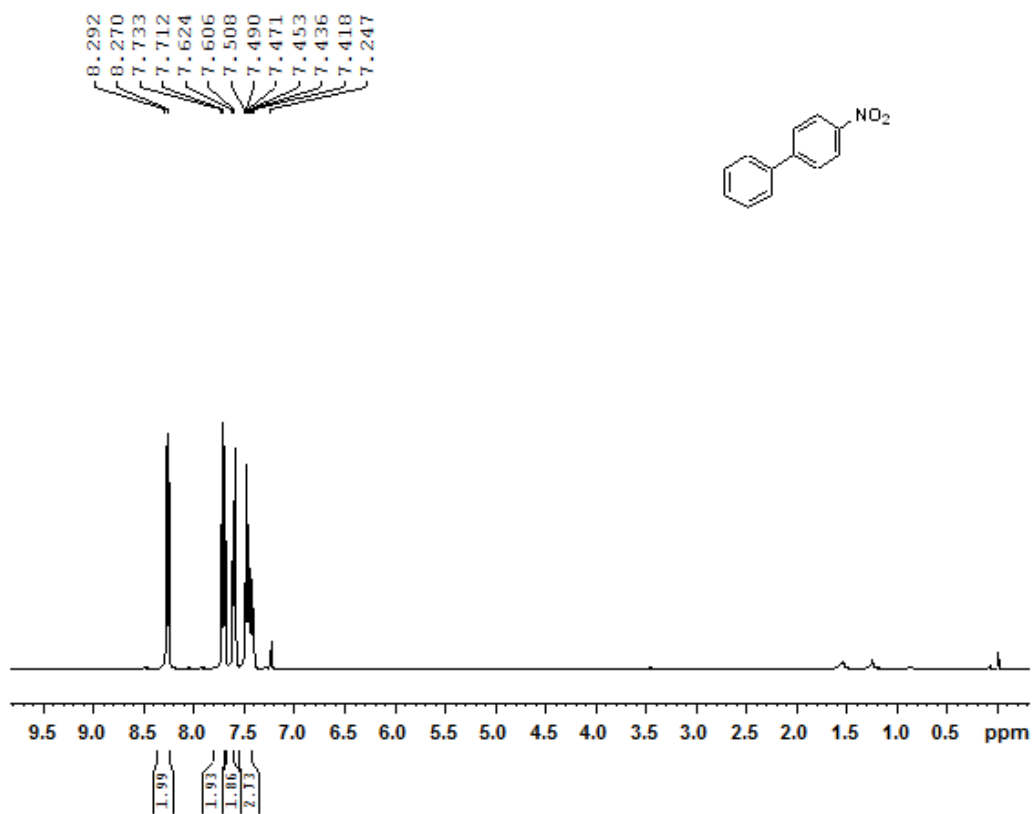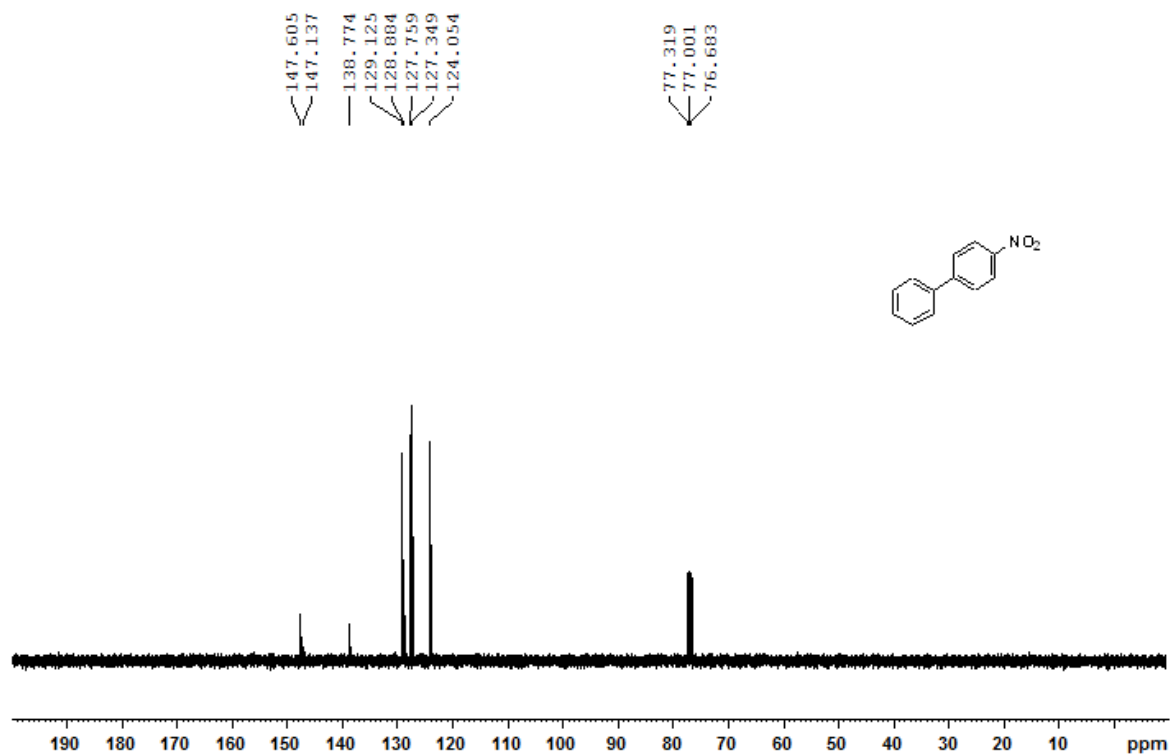

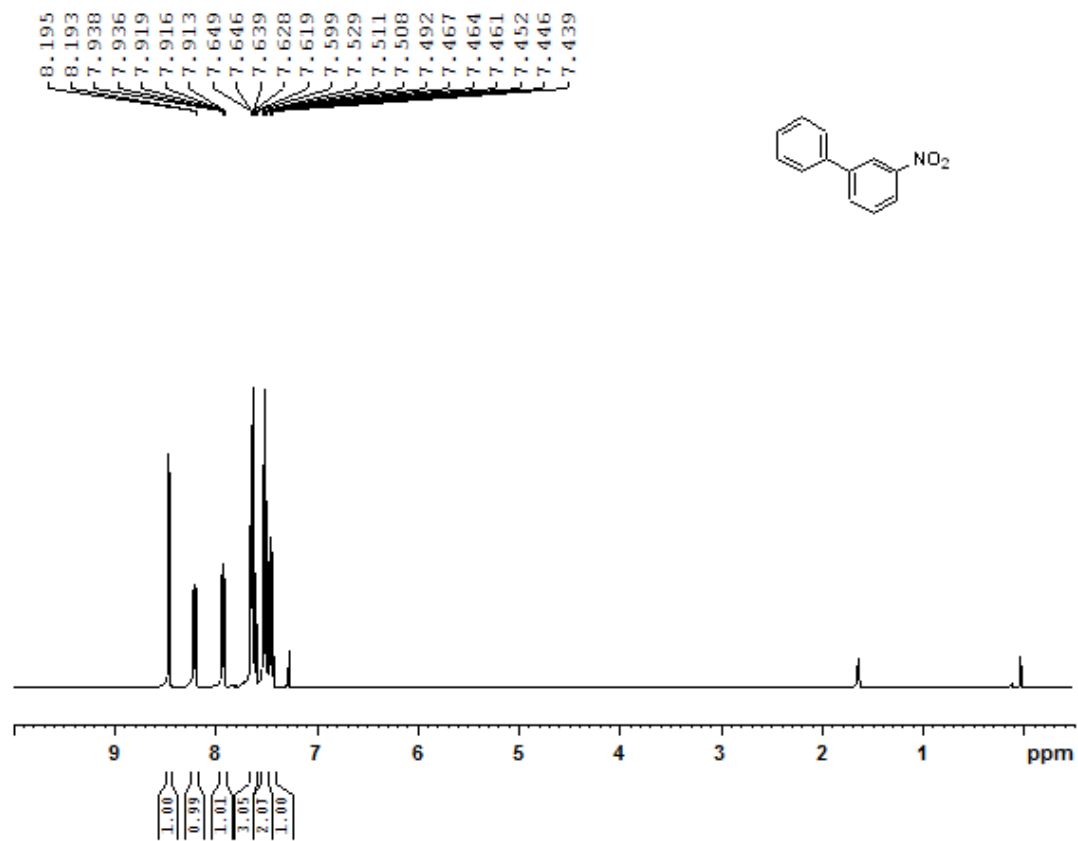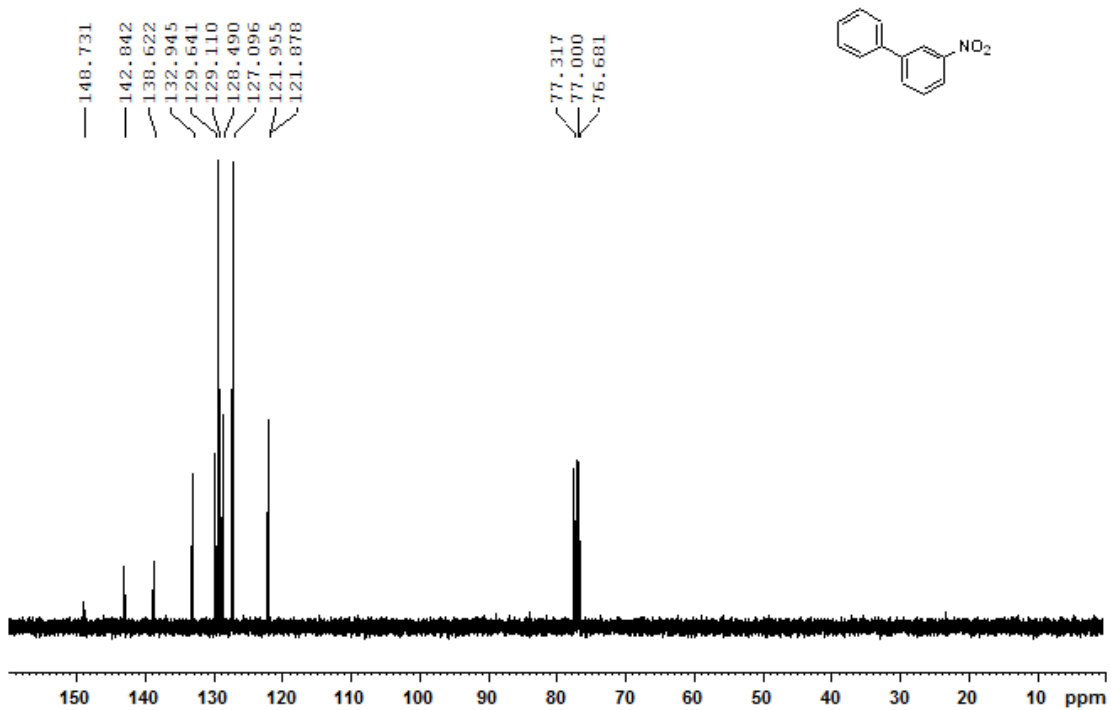

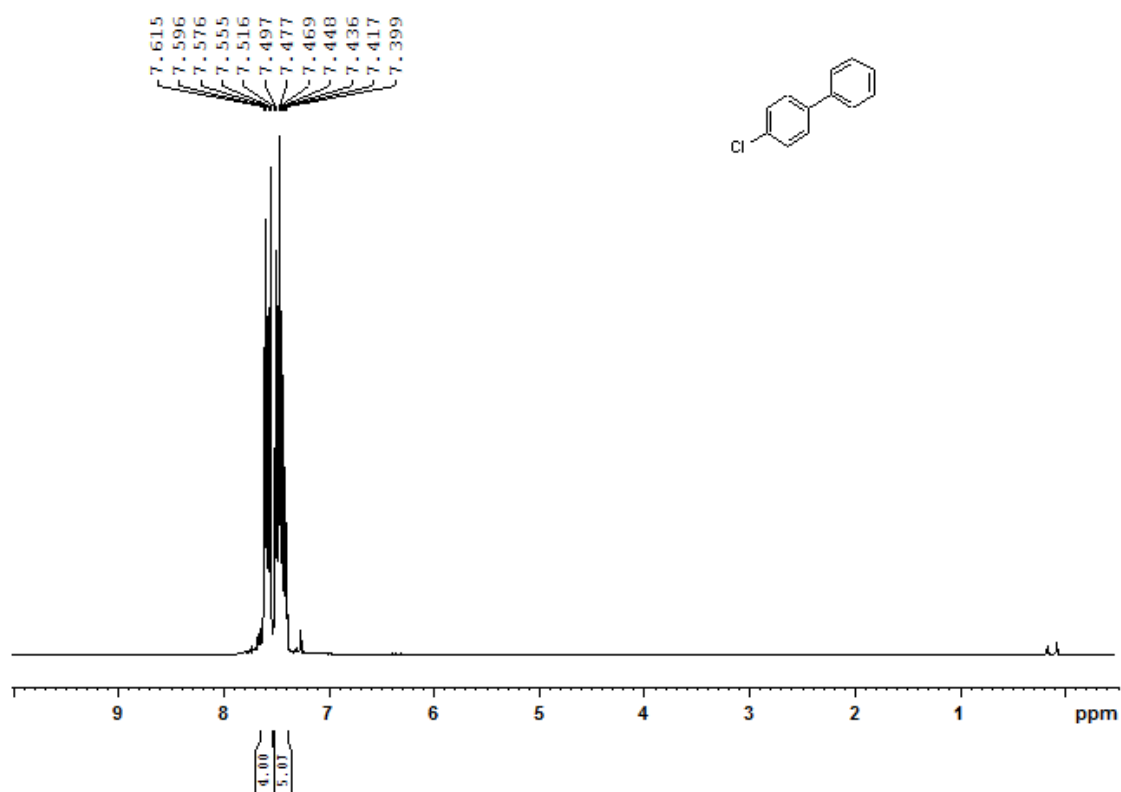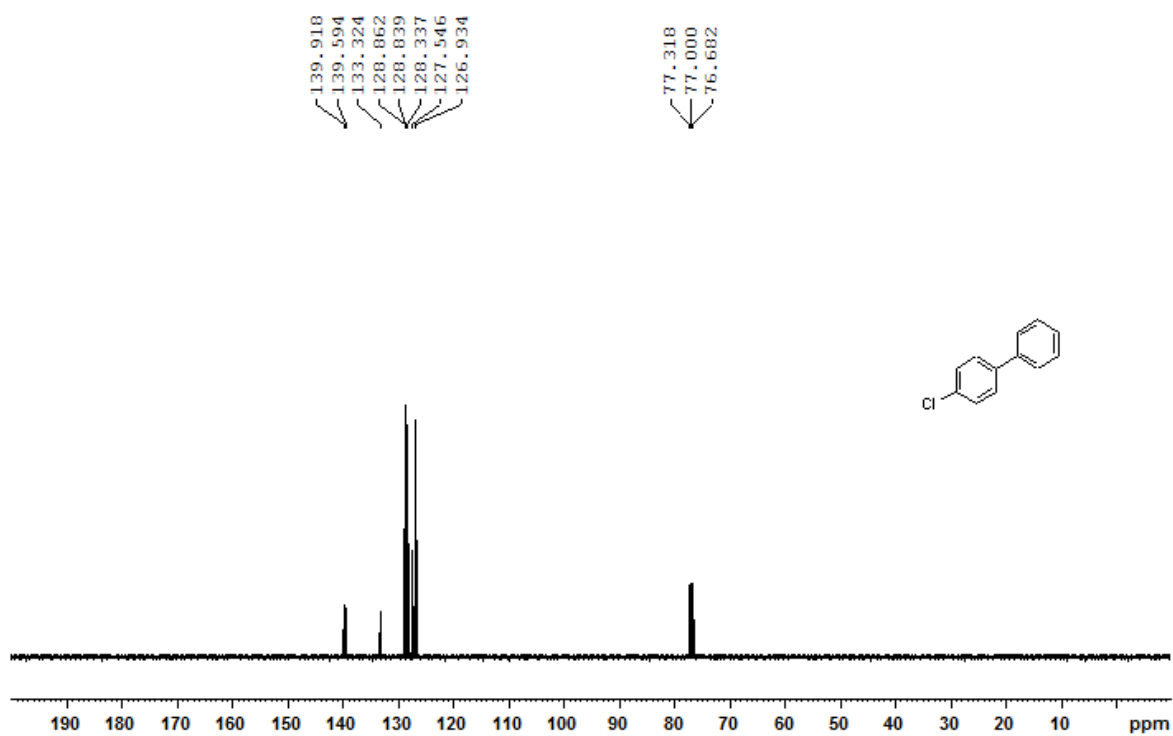

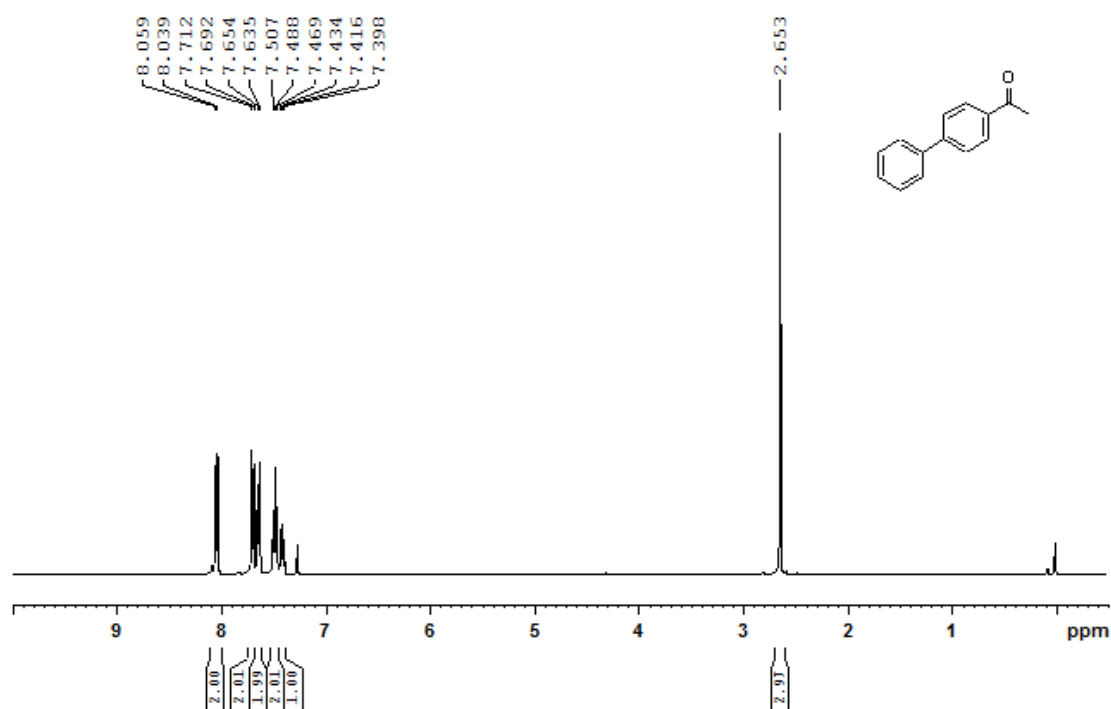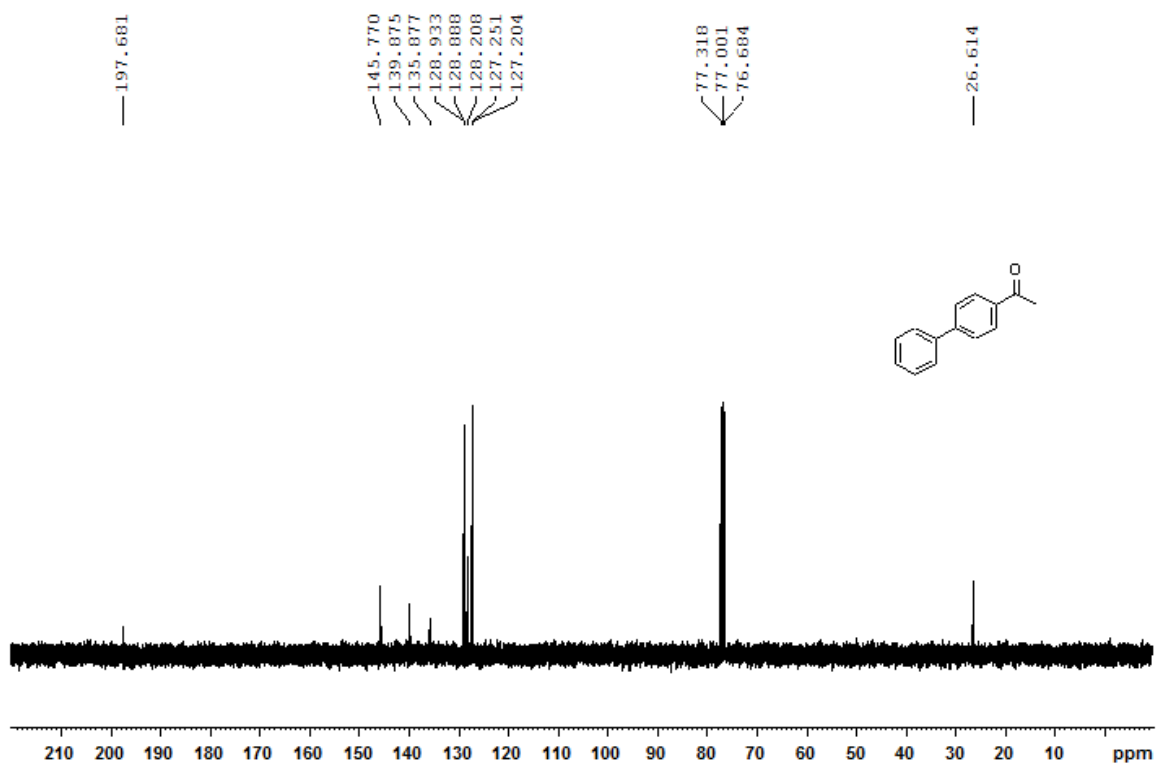

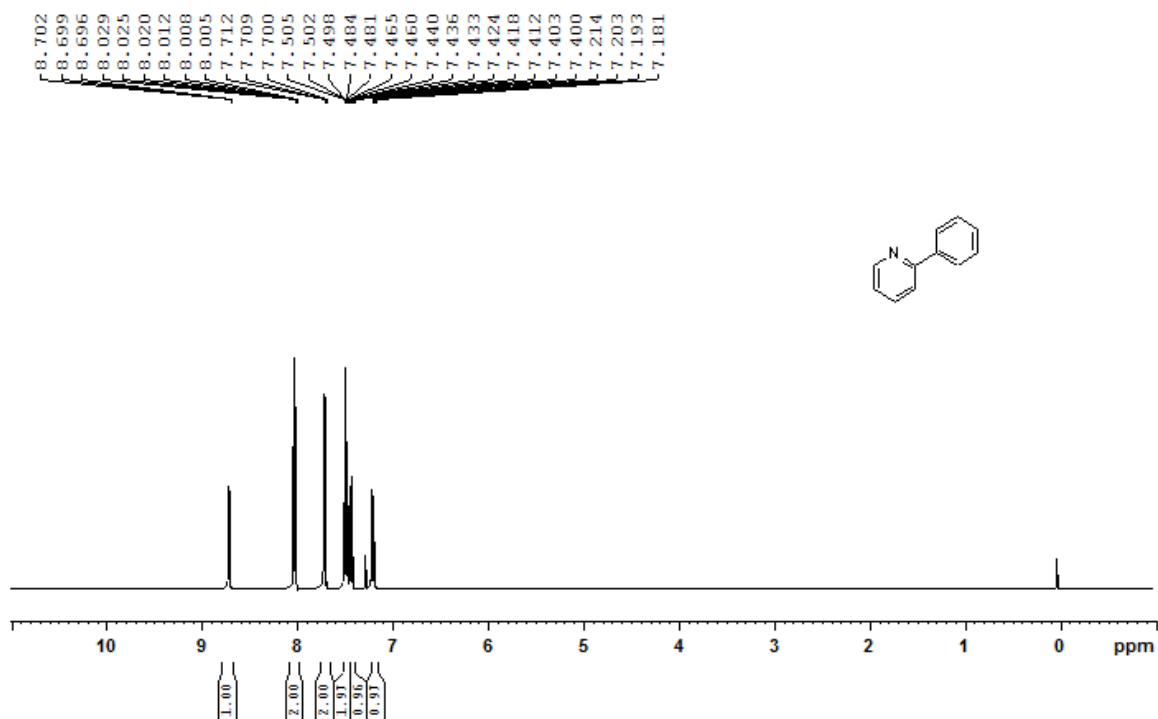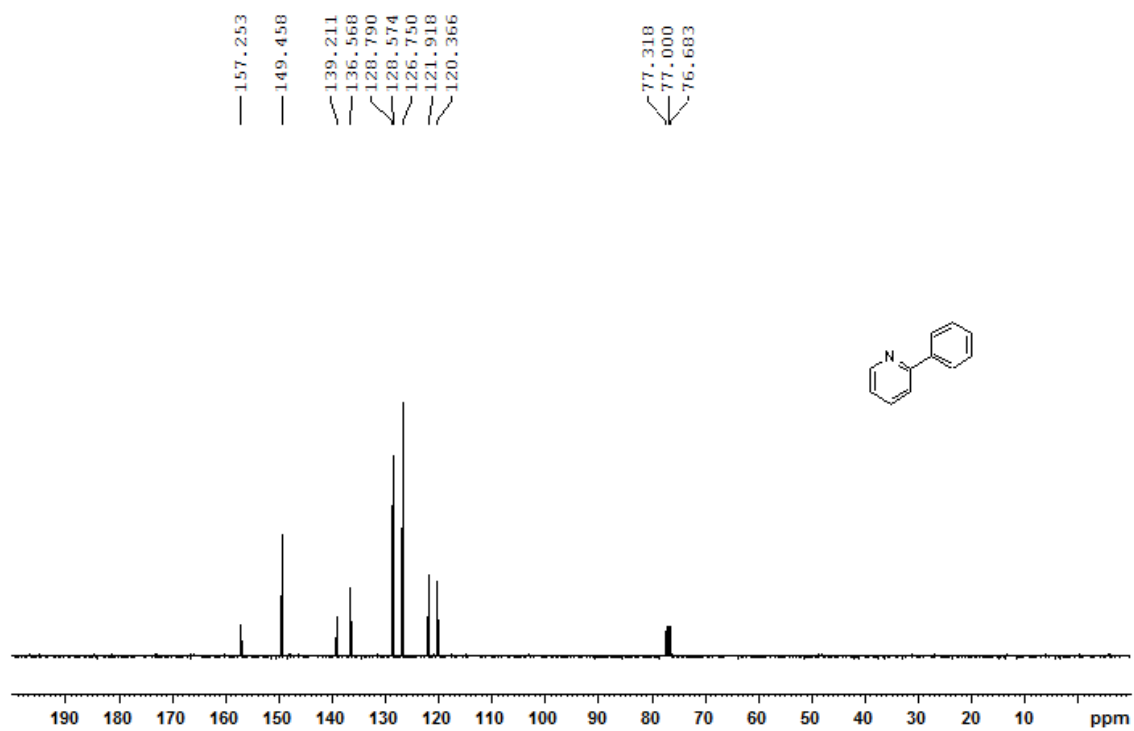

Supplement: c2cy20162c.pdf [file c2cy20162c.pdf]
